# Supplementary material for: Survival Rates of Breast Cancer Patients Aged 40 to 49 Years according to Detection Modality in Korea: Screening Ultrasound versus Mammography
Source: PubMed Central journal article supplement — Korean J Radiol. 2020 Aug 28;22(2):159–67. doi: 10.3348/kjr.2019.0588 (PMC7817635; doi:10.3348/kjr.2019.0588), 2020-08-28
Supplement: kjr-22-159-s001.pdf [file kjr-22-159-s001.pdf]

**Supplementary Table 1. Therapeutic and Pathologic Characteristics of the US and Mammography Group**

| Characteristic            | Mammography (n = 197) | US (n = 43)   | P       |
|---------------------------|-----------------------|---------------|---------|
| Surgery type              |                       |               | < 0.001 |
| Breast-conserving surgery | 73 (37.1)             | 32 (74.4)     |         |
| Total mastectomy          | 124 (62.9)            | 11 (25.6)     |         |
| Invasiveness              |                       |               | 0.955   |
| Non-invasive              | 42 (21.3)             | 9 (20.9)      |         |
| Invasive                  | 155 (78.7)            | 34 (79.1)     |         |
| Tumor size (cm)           | 1.332 ± 1.074         | 1.154 ± 0.839 | 0.306   |
| T stage                   |                       |               | 0.708   |
| T0                        | 42 (21.3)             | 9 (20.9)      |         |
| T1                        | 113 (57.4)            | 28 (65.1)     |         |
| T2                        | 42 (21.3)             | 6 (14.0)      |         |
| T3                        | 0 (0)                 | 0 (0)         |         |
| T4                        | 0 (0)                 | 0 (0)         |         |
| N stage                   |                       |               | 0.693   |
| N0                        | 147 (74.6)            | 36 (83.7)     |         |
| N1                        | 32 (16.2)             | 4 (9.3)       |         |
| N2                        | 12 (6.1)              | 2 (4.7)       |         |
| N3                        | 6 (3.1)               | 1 (2.3)       |         |
| Histologic grade          |                       |               | 0.060   |
| Not-high                  | 137 (69.5)            | 28 (83.7)     |         |
| High                      | 60 (30.5)             | 4 (16.3)      |         |
| Chemotherapy              |                       |               | 0.799   |
| Absent                    | 92 (46.7)             | 21 (48.8)     |         |
| Present                   | 105 (53.3)            | 22 (51.2)     |         |
| Endocrine therapy         |                       |               | 0.066   |
| Absent                    | 59 (29.9)             | 7 (16.3)      |         |
| Present                   | 137 (69.6)            | 36 (83.7)     |         |
| N/A                       | 1 (0.5)               | 0 (0)         |         |
| Radiation therapy         |                       |               | < 0.001 |
| Absent                    | 106 (53.8)            | 8 (18.6)      |         |
| Present                   | 91 (46.2)             | 35 (81.4)     |         |
| Estrogen receptor         |                       |               | 0.281   |
| Negative                  | 57 (28.9)             | 9 (20.9)      |         |
| Positive                  | 135 (68.6)            | 33 (76.7)     |         |
| N/A                       | 5 (2.5)               | 1 (2.3)       |         |
| Progesterone receptor     |                       |               | 0.206   |
| Negative                  | 60 (30.5)             | 9 (20.9)      |         |
| Positive                  | 132 (67.0)            | 33 (76.8)     |         |
| N/A                       | 5 (2.5)               | 1 (2.3)       |         |
| HER2 receptor             |                       |               | 0.465   |
| Negative                  | 123 (62.5)            | 31 (72.1)     |         |
| Positive                  | 41 (20.8)             | 6 (14.0)      |         |
| Unknown                   | 28 (14.2)             | 5 (11.6)      |         |
| N/A                       | 5 (2.5)               | 1 (2.3)       |         |

Results are expressed as numbers (percents), with means ± standard deviations (ranges). Differences were significant if the *p* value was less than 0.05. *HER2* = human epidermal growth factor receptor 2, N/A = not available, US = ultrasound
